# Supplementary material
Source: PubMed Central journal article supplement (PMC4971930)

A

3'-gauggacgugacAUUCGUGAAAc-5' hsa-miR-17

3'-gauggacgugauAUUCGUGAAAu-5' hsa-miR-20a

3'-gauggacgugauACUCGUGAAAc-5' hsa-miR-20b

3'-gauggacgugacauUCGUGAAAa-5' hsa-miR-106a

3'-uagacgugacagUCGUGAAAu-5' hsa-miR-106b

B

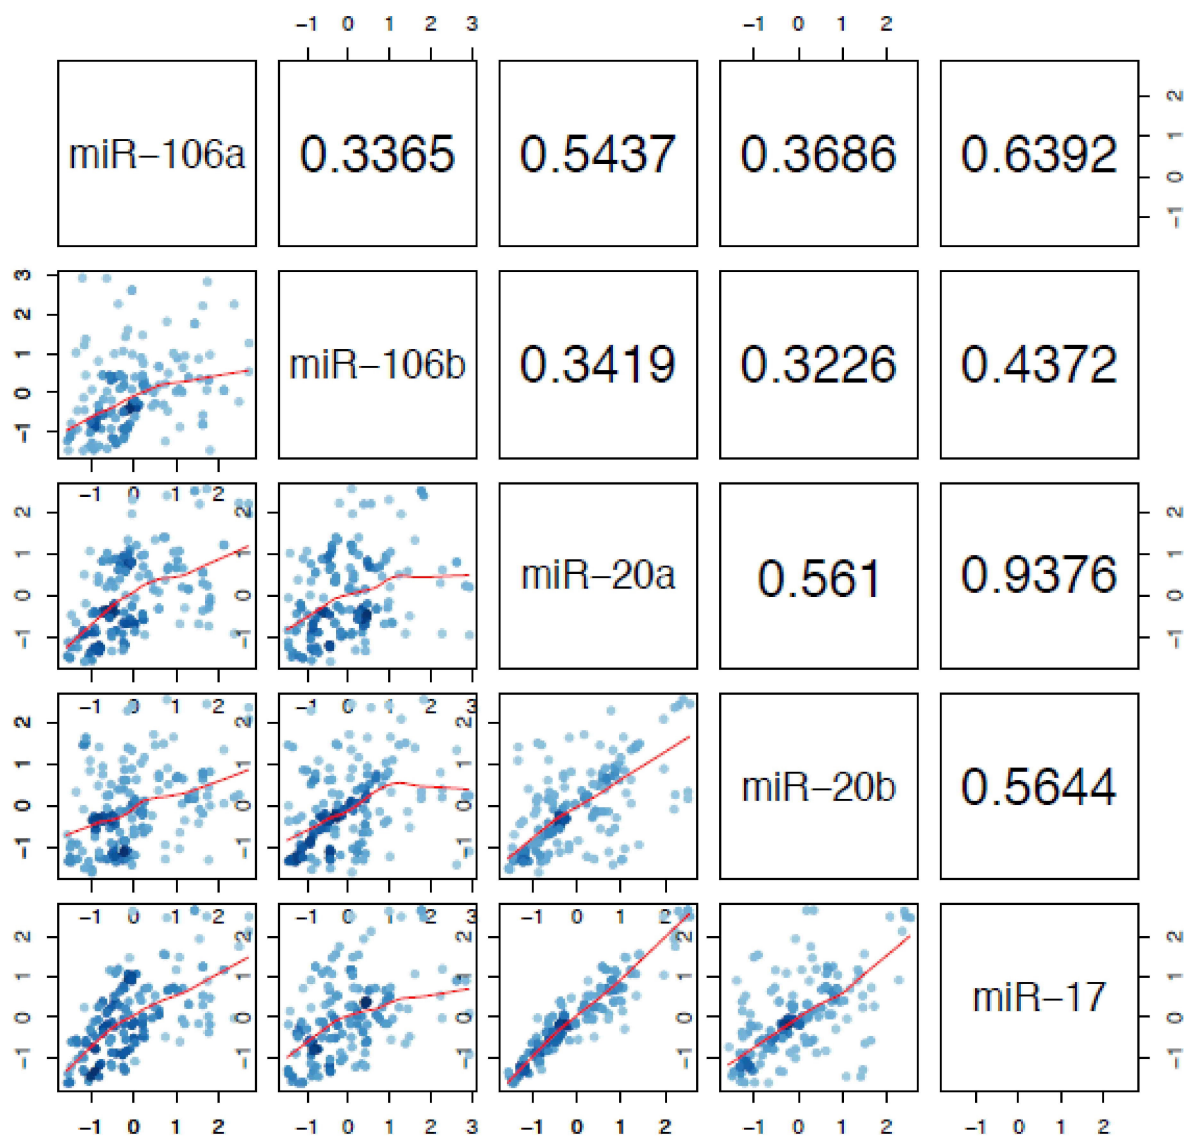

Supplement: CAM4-5-2022-s001.pdf [file CAM4-5-2022-s001.pdf]
