# Supplementary material
Source: PubMed Central journal article supplement (PMC4971930)

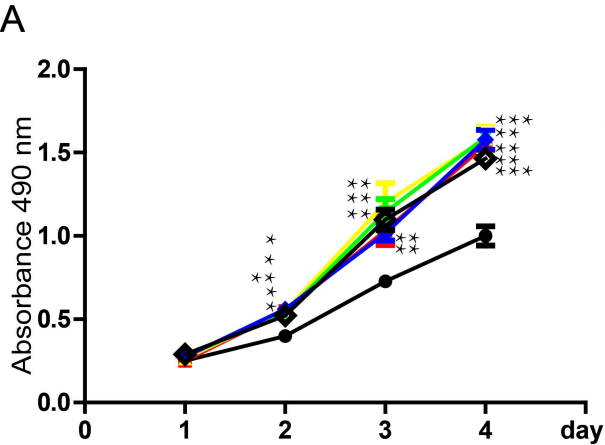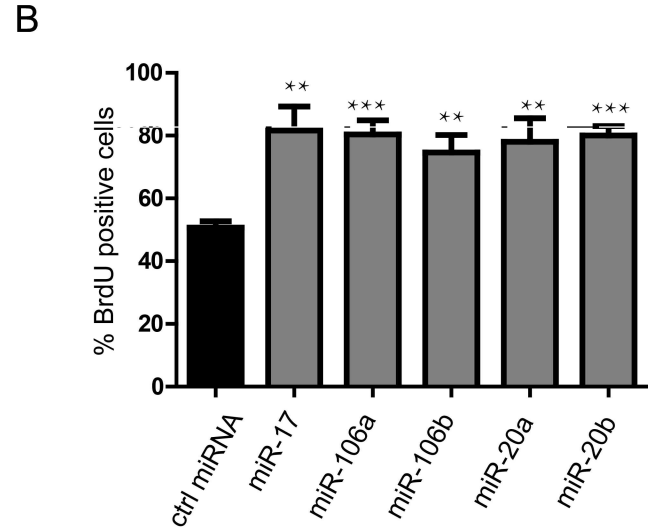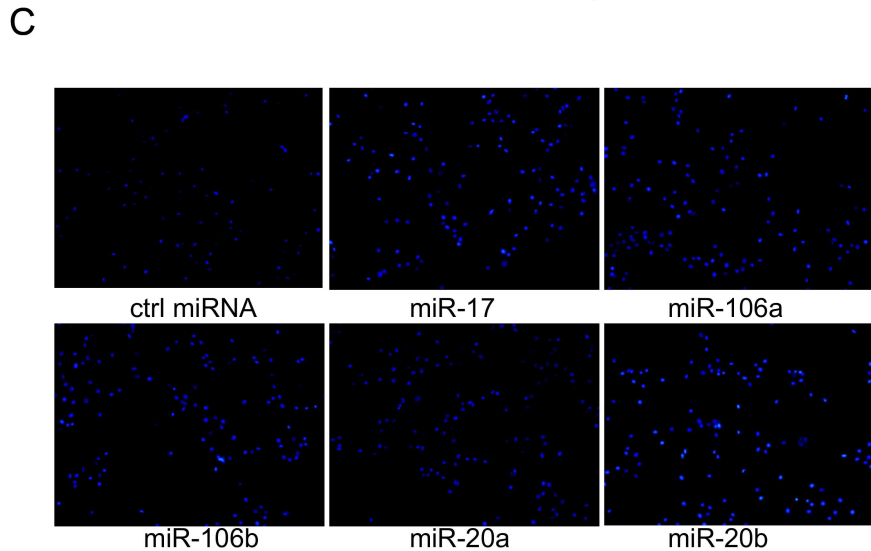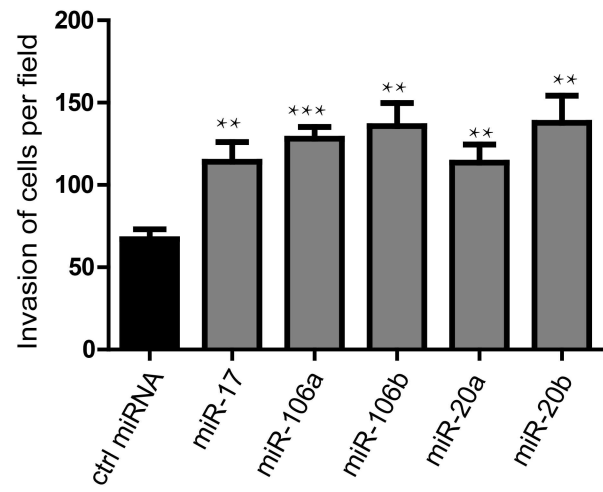

Supplement: CAM4-5-2022-s002.pdf [file CAM4-5-2022-s002.pdf]
