# Supplementary material
Source: PubMed Central journal article supplement (PMC4971930)

**A**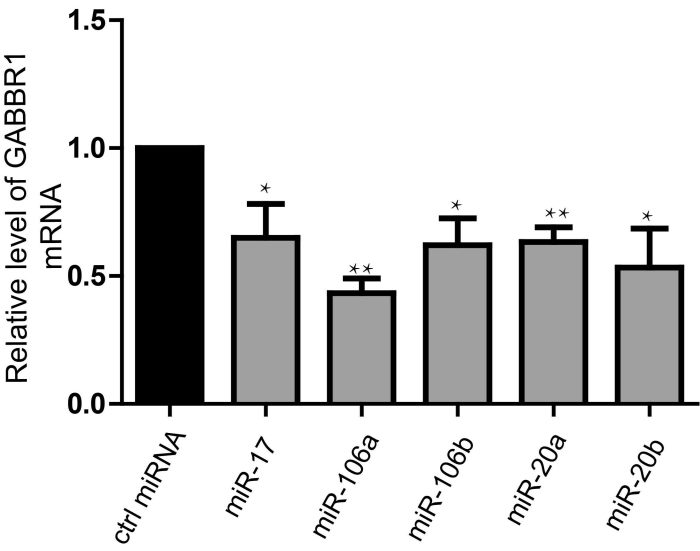**B**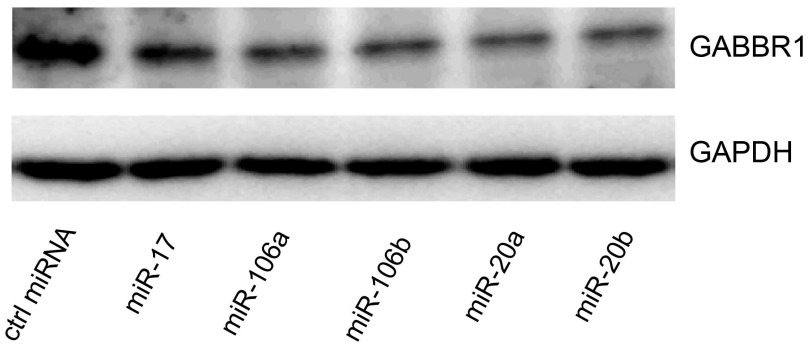

Supplement: CAM4-5-2022-s003.pdf [file CAM4-5-2022-s003.pdf]
