# Supplementary material
Source: PubMed Central journal article supplement (PMC4971930)

**A**

Relative level of GABBR1  
mRNA

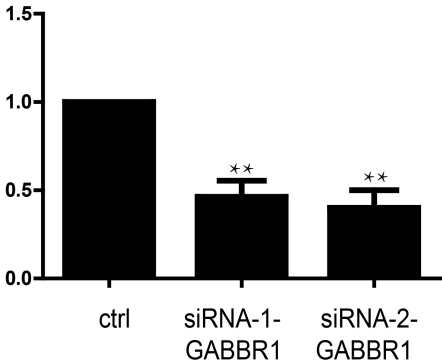

Supplement: CAM4-5-2022-s004.pdf [file CAM4-5-2022-s004.pdf]
