# Supplementary material
Source: PubMed Central journal article supplement (PMC4971930)

**A**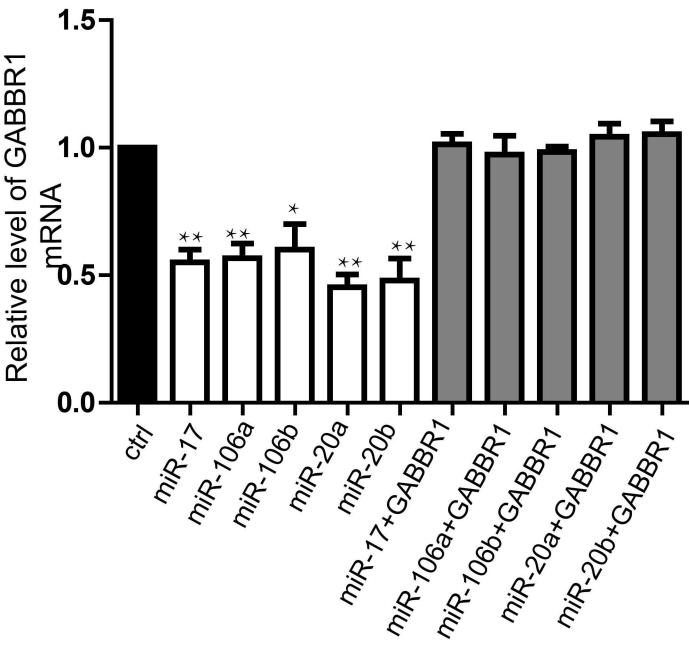

Supplement: CAM4-5-2022-s005.pdf [file CAM4-5-2022-s005.pdf]
